# Supplementary material for: Defective transition metal hydroxide-based nanoagents with hypoxia relief for photothermal-enhanced photodynamic therapy
Source: Royal Society of Chemistry journal article supplement (doi:10.1039/d0tb02486d), 2020-12-18
Supplement: d0tb02486d1.pdf [file d0tb02486d1.pdf]

## Supporting Information

### **Defective Transition Metal Hydroxide Based Nanoagent with Hypoxia Relief for Photothermal-enhanced Photodynamic Therapy**

**Tianren Xu,<sup>a</sup> Xiaojiao Zhu,<sup>\*a</sup> Li Yang,<sup>a</sup> Yingcui Bu,<sup>a</sup> Yuyang Zhang,<sup>a</sup> Jie Zhang,<sup>b</sup> Lianke Wang,<sup>b</sup> Zhipeng Yu<sup>b</sup> and Hongping Zhou<sup>\*a</sup>**

*<sup>a</sup> College of Chemistry and Chemical Engineering, Anhui University and Key Laboratory of Functional Inorganic Materials Chemistry of Anhui Province, Anhui Province Key Laboratory of Chemistry for Inorganic/Organic Hybrid Functionalized Materials, Key Laboratory of Structure and Functional Regulation of Hybrid Materials (Anhui University) Ministry of Education, Hefei, 230601, P. R. China.*

*<sup>b</sup> Institute of Physical Science and Information Technology, Faculty of Health Sciences, Anhui University, Hefei, 230601, P. R. China.*

*\* Corresponding authors: xiaojzhu@ahu.edu.cn (Xiaojiao Zhu) and zhpzhp@263.net (Hongping Zhou).*

## Supporting Information

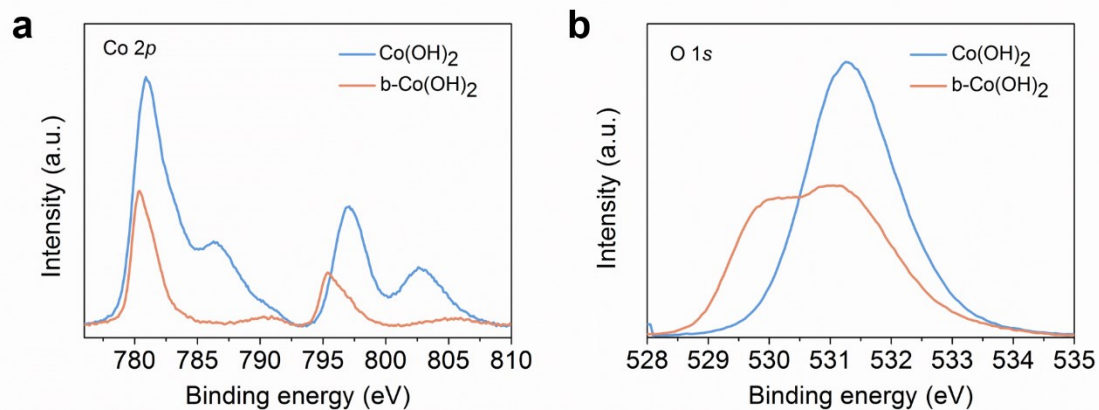

**Fig. S1.** (a) Co 2p XPS spectra of Co(OH)<sub>2</sub> and b-Co(OH)<sub>2</sub>. (b) O 1s XPS spectra of Co(OH)<sub>2</sub> and b-Co(OH)<sub>2</sub>.

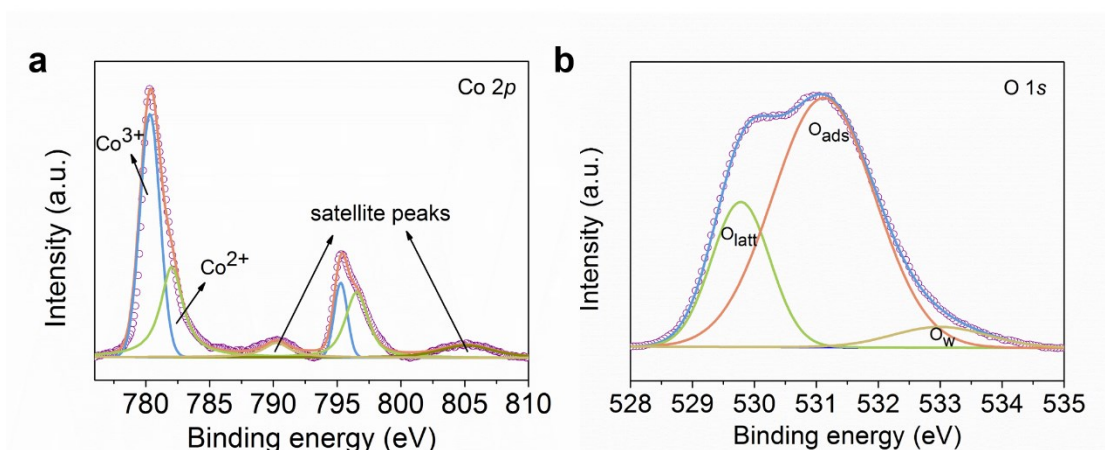

**Fig. S2.** (a) XPS Co 2p spectra of b-Co(OH)<sub>2</sub>. (b) XPS O 1s spectra of b-Co(OH)<sub>2</sub>.

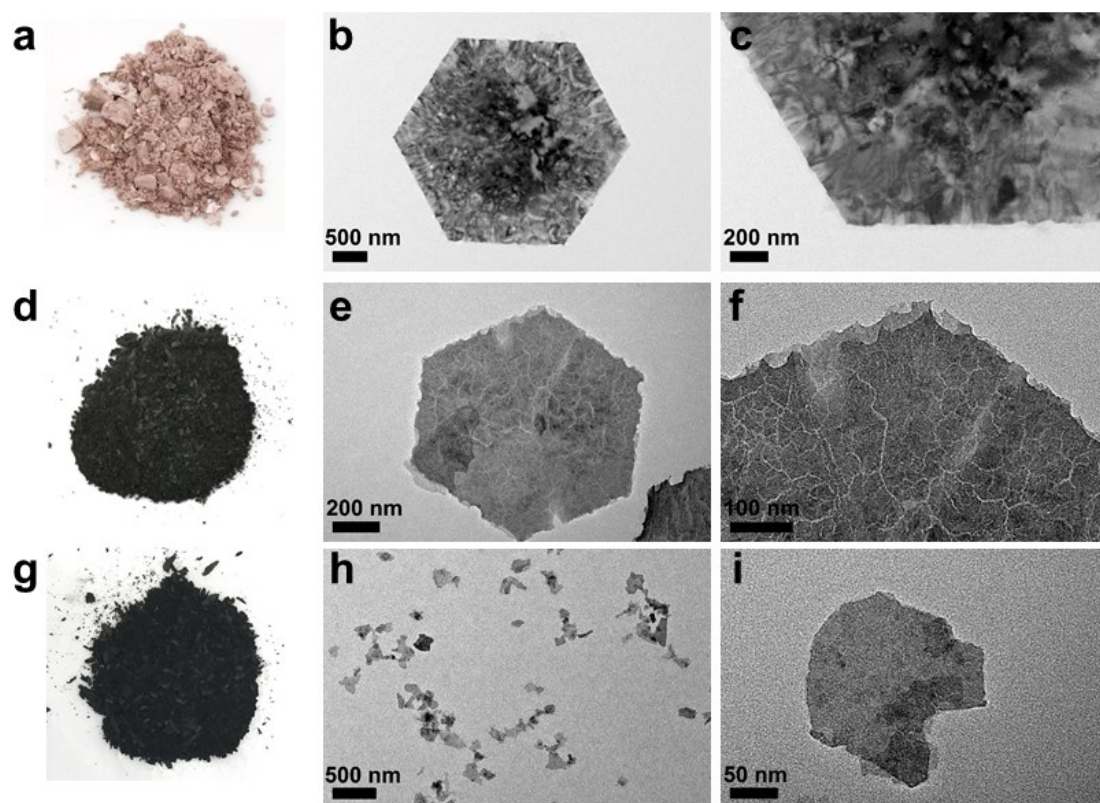

**Fig. S3.** Digital pictures of (a) Co-Ni hydroxides, (d) b-Co-Ni hydroxides and (g) b-Co-Ni hydroxides (after tip-sonication) powder. TEM images of (b-c) Co-Ni hydroxides, (e-f) b-Co-Ni hydroxides and (h-i) b-Co-Ni hydroxides (after tip-sonication) nanosheets at different scales.

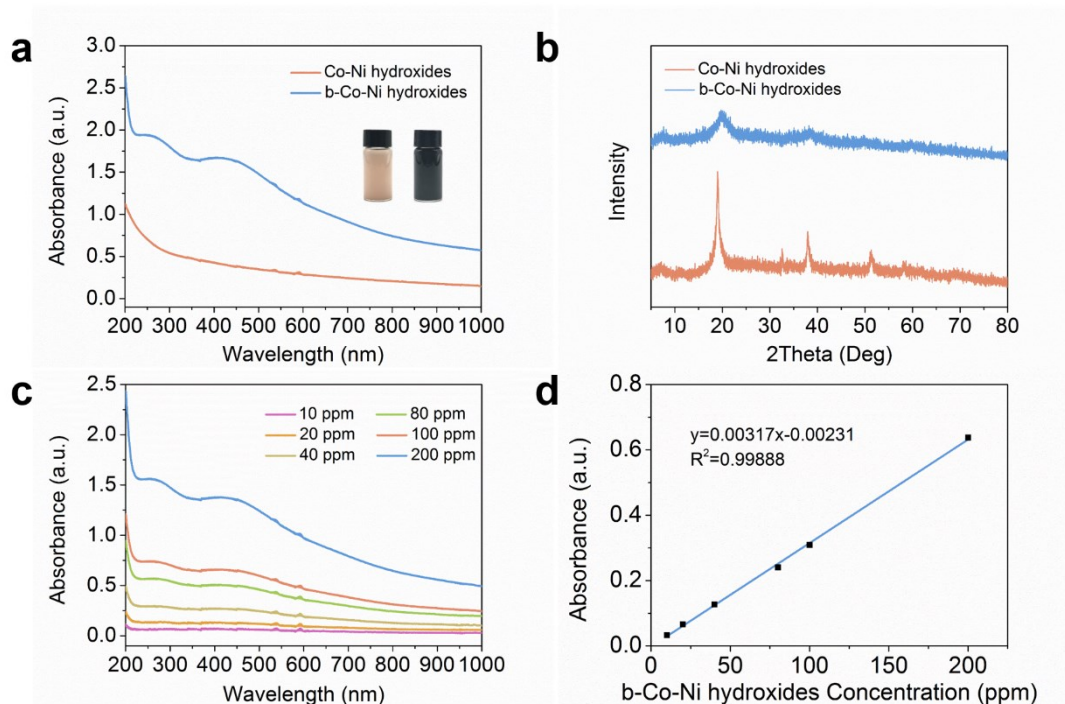

**Fig. S4.** (a) UV-vis spectra of Co-Ni hydroxides and b-Co-Ni hydroxides. The inset showed the color change of Co-Ni hydroxides after oxidation. (b) XRD patterns of Co-Ni hydroxides and b-Co-Ni hydroxides. (c) UV-vis spectra of b-Co-Ni hydroxides at different concentrations. (d) The linear relationship between optical absorbance and the concentration of b-Co-Ni hydroxides at 808 nm.

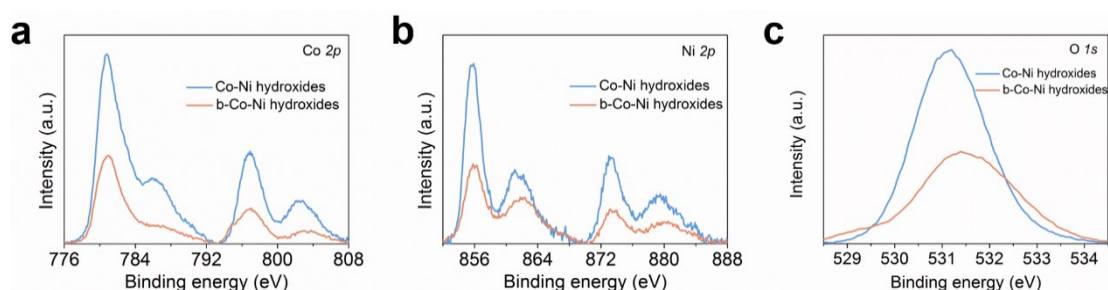

**Fig. S5.** (a) Co 2p XPS spectra of Co-Ni hydroxides and b-Co-Ni

hydroxides. (b) Ni 2p XPS spectra of Co-Ni hydroxides and b-Co-Ni hydroxides. (c) O 1s XPS spectra of Co-Ni hydroxides and b-Co-Ni hydroxides.

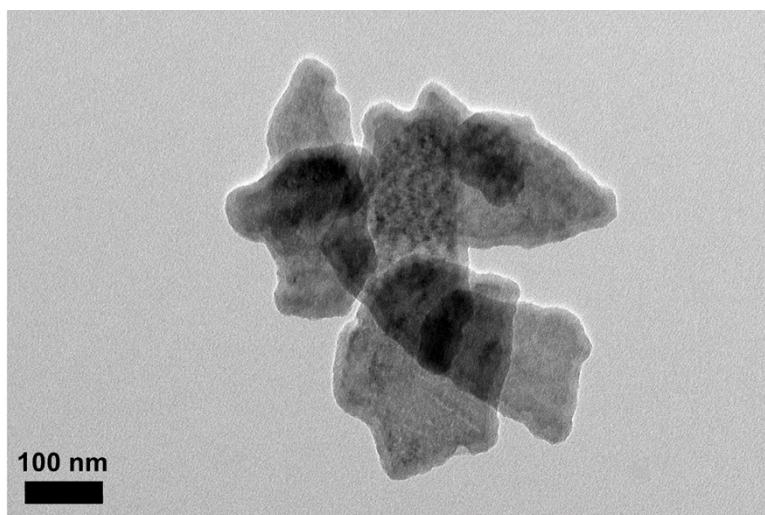

**Fig. S6.** TEM image of b-Co(OH)<sub>2</sub>@SiO<sub>2</sub>.

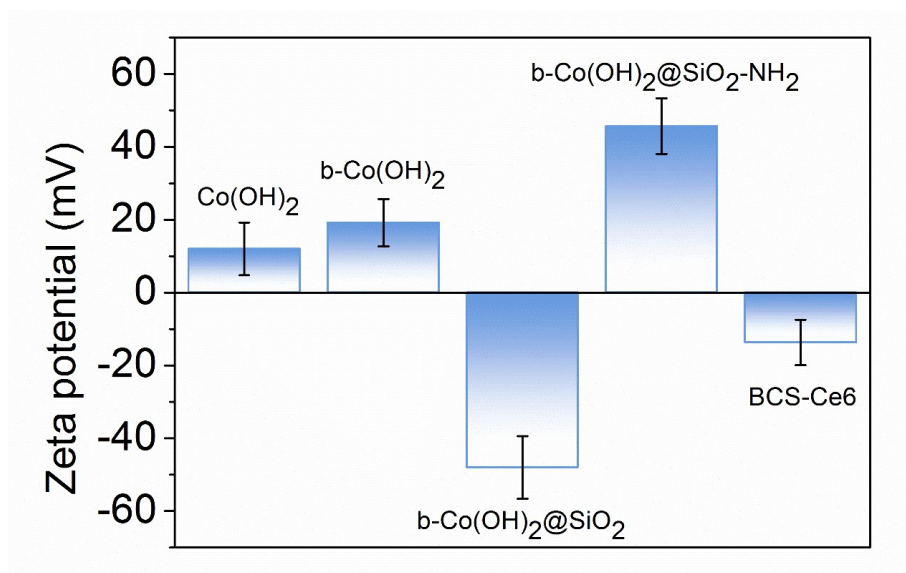

**Fig. S7.** Zeta potentials of Co(OH)<sub>2</sub>, b-Co(OH)<sub>2</sub>, b-Co(OH)<sub>2</sub>@SiO<sub>2</sub>, b-Co(OH)<sub>2</sub>@SiO<sub>2</sub>-NH<sub>2</sub> and BCS-Ce6.



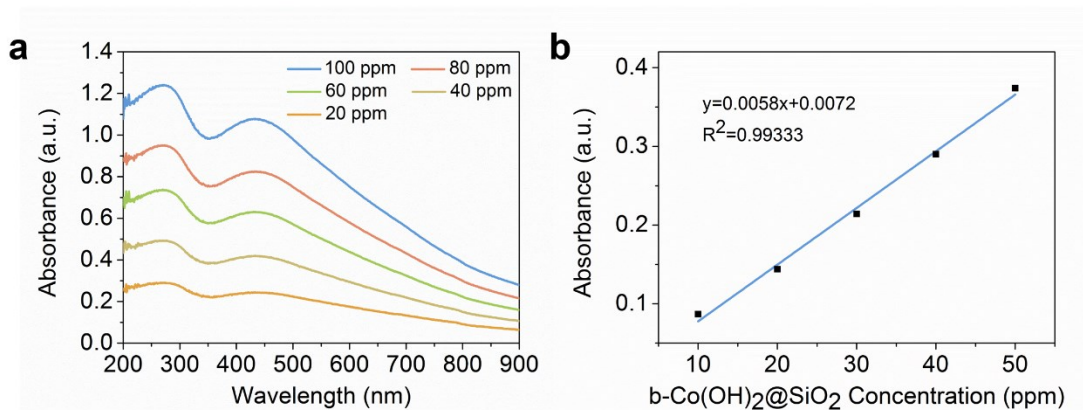

**Fig. S8.** (a) UV-vis spectra of b-Co(OH)<sub>2</sub>@SiO<sub>2</sub> at different concentrations. (b) The linear relationship of the absorbance at 808 nm as a function of b-Co(OH)<sub>2</sub>@SiO<sub>2</sub> concentration.

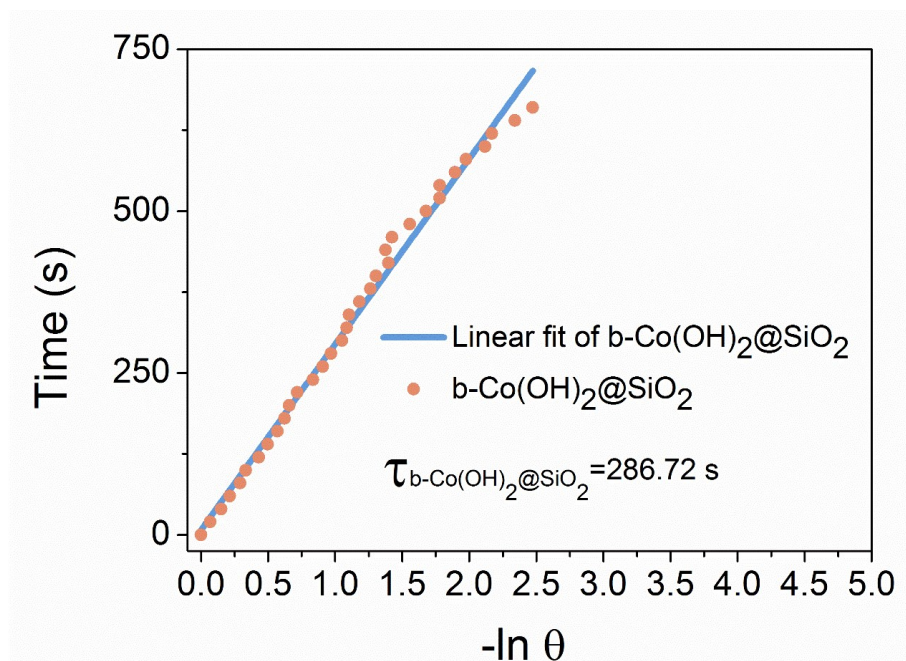

**Fig. S9.** Linear time data versus  $-\ln \theta$  obtained from the cooling period in Figure 2c of b-Co(OH)<sub>2</sub>@SiO<sub>2</sub>.

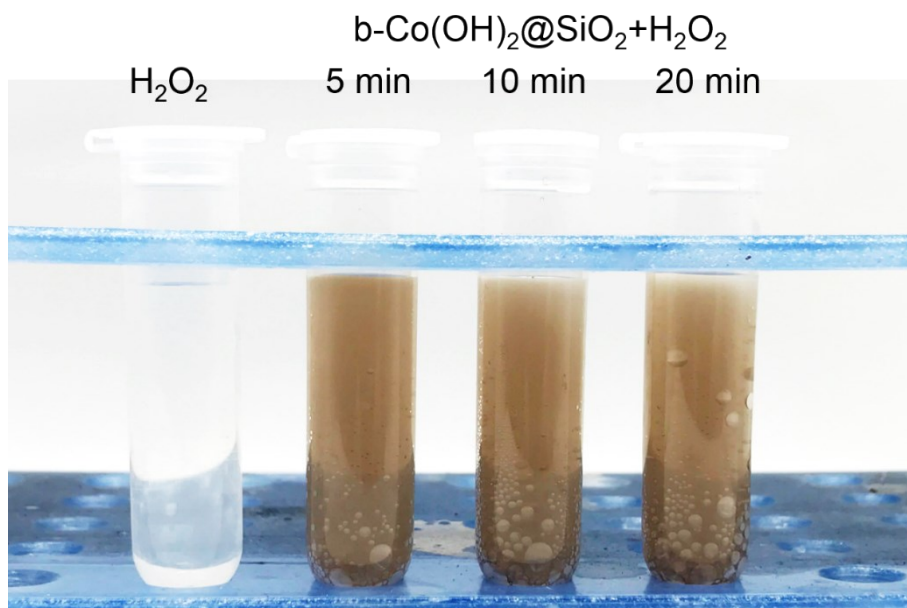

**Fig. S10.** Pictures of bubbles produced by the decomposition of hydrogen peroxide (5 mM) in the solution of b-Co(OH)<sub>2</sub>@SiO<sub>2</sub> (100 ppm) at different time points (5 min, 10 min and 20 min).

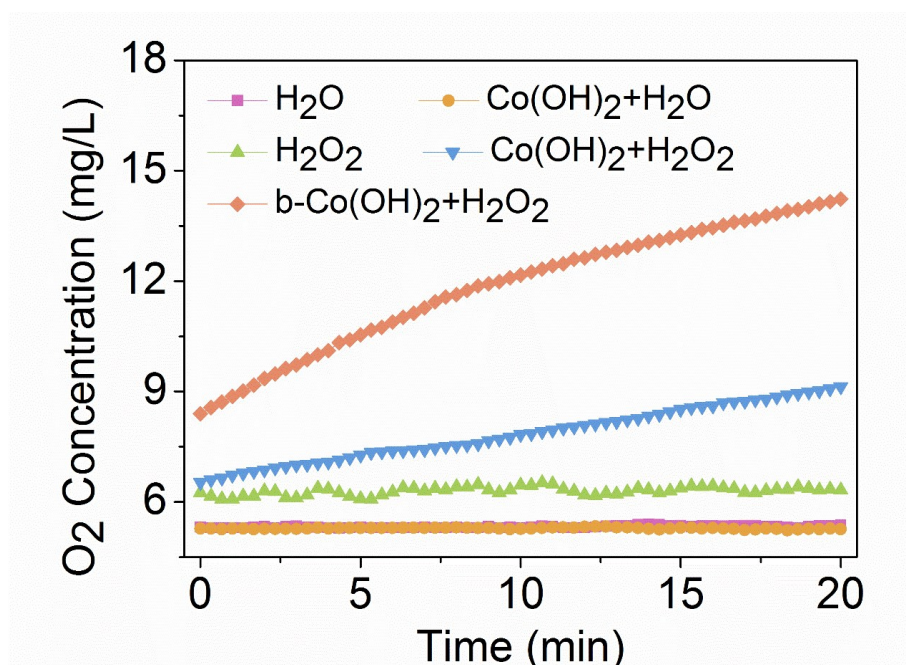

**Fig. S11.** The oxygen level variation of different solutions (water, H<sub>2</sub>O<sub>2</sub>, Co(OH)<sub>2</sub>, Co(OH)<sub>2</sub>+H<sub>2</sub>O<sub>2</sub>, b-Co(OH)<sub>2</sub>+H<sub>2</sub>O<sub>2</sub>) over time.

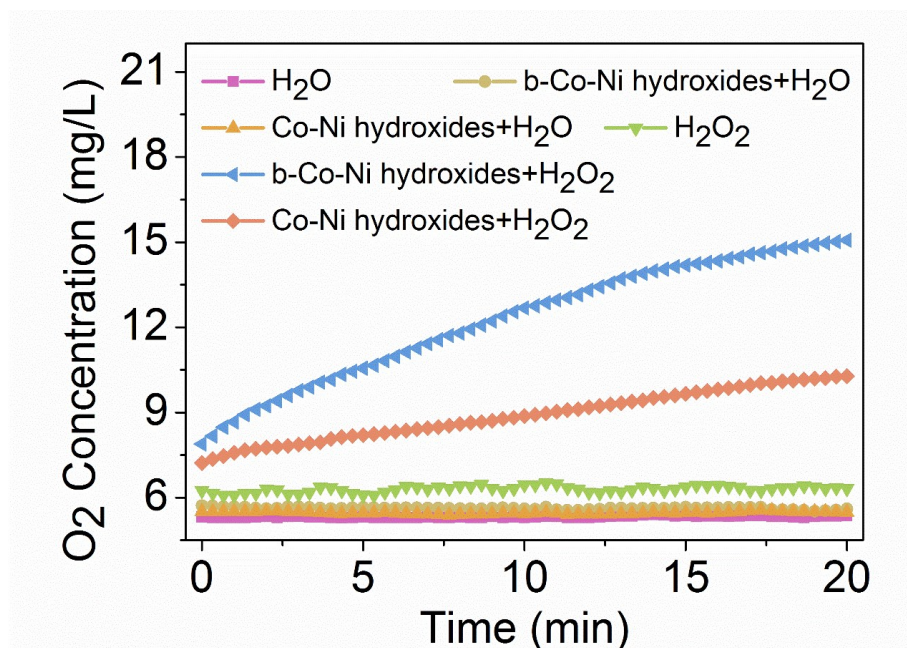

**Fig. S12.** The oxygen level variation of different solutions (water,  $\text{H}_2\text{O}_2$ , Co-Ni hydroxides, b-Co-Ni hydroxides, Co-Ni hydroxides+ $\text{H}_2\text{O}_2$  and b-Co-Ni hydroxides+ $\text{H}_2\text{O}_2$ ) over time.

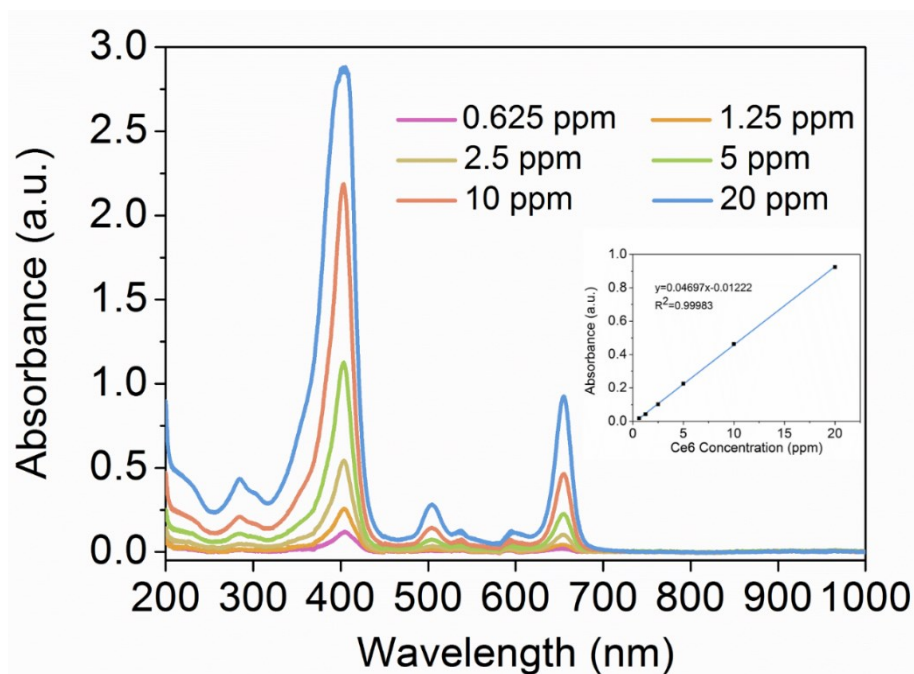

**Fig. S13.** UV-vis spectra of Ce6 at various concentrations. The inset indicated the normalized absorbance of different Ce6 concentrations at 655



nm.

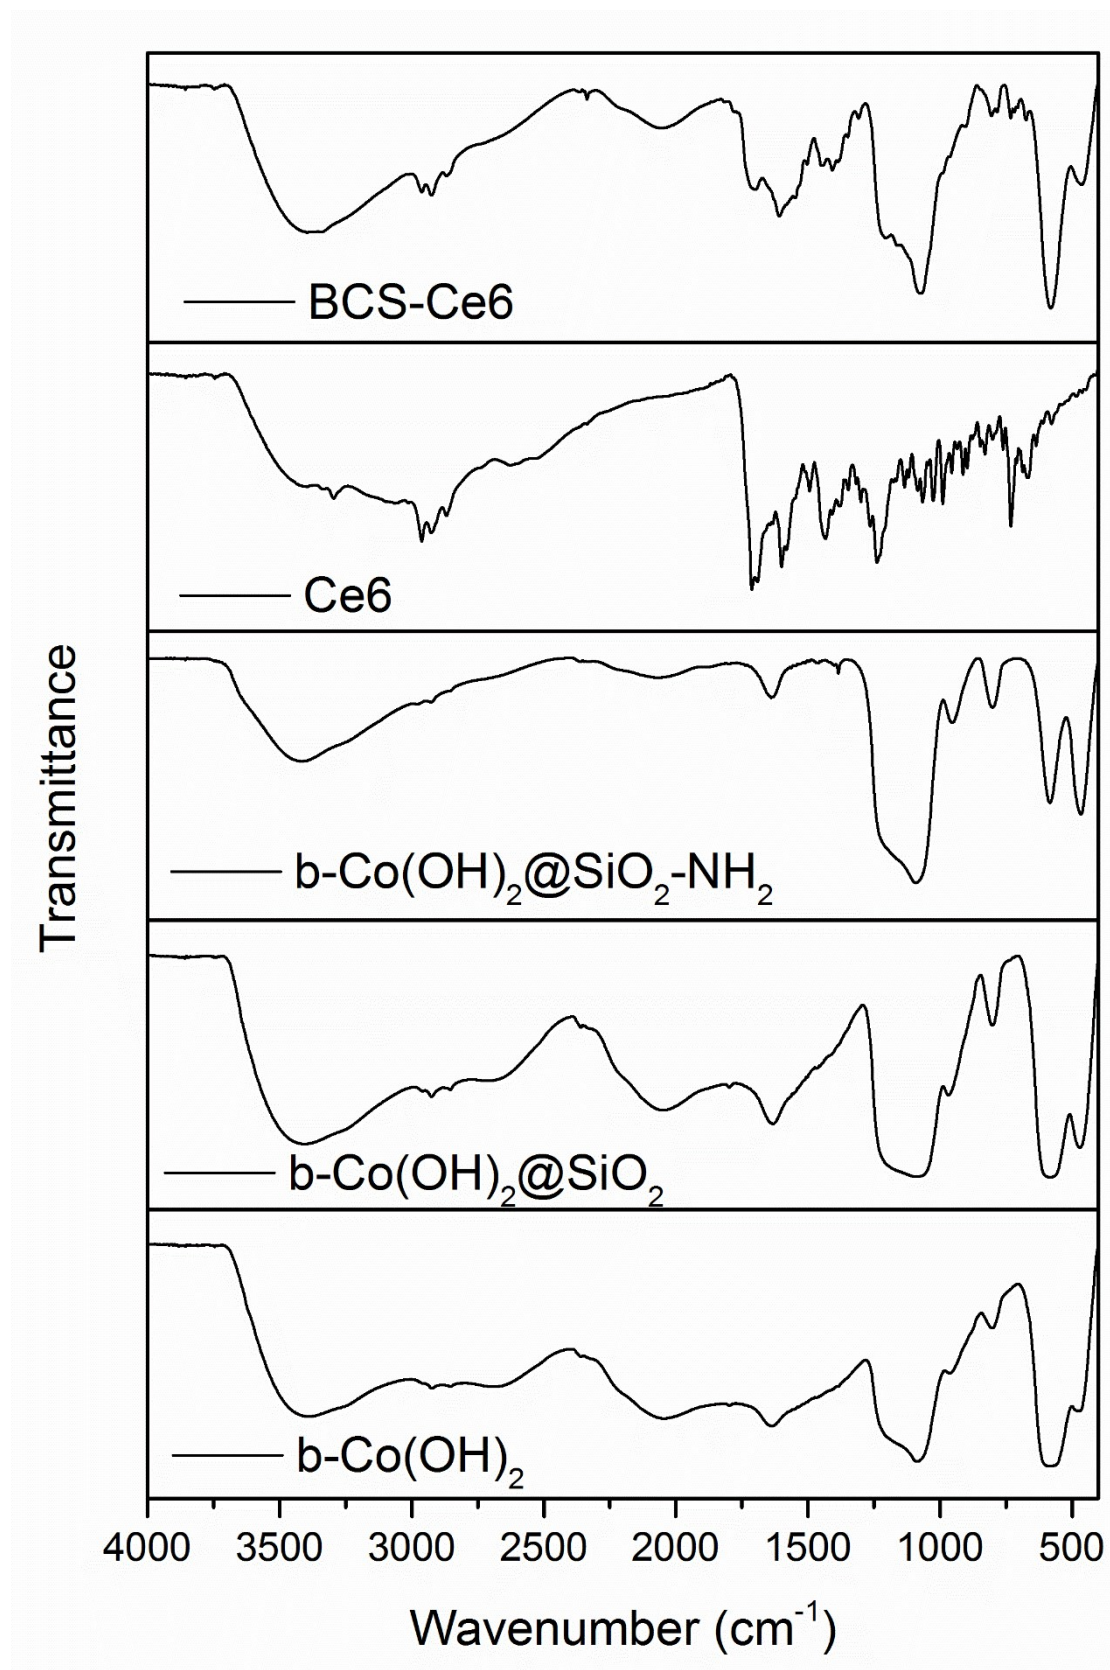

**Fig. S14.** FT-IR spectroscopy of b-Co(OH)<sub>2</sub>, b-Co(OH)<sub>2</sub>@SiO<sub>2</sub>, b-

$\text{Co(OH)}_2@\text{SiO}_2\text{-NH}_2$ , Ce6 and BCS-Ce6.

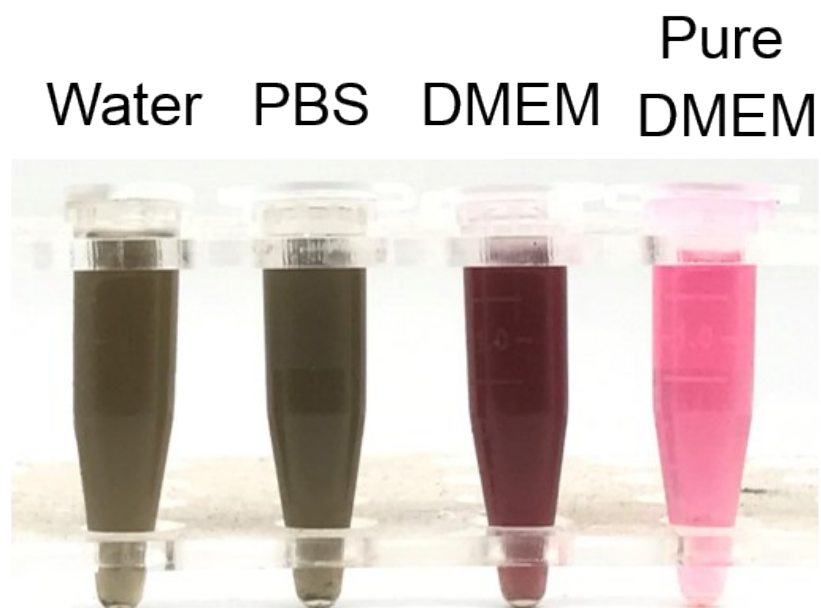

**Fig. S15.** Photograph of BCS-Ce6 in water, PBS and DMEM. Pure DMEM was placed as a comparison.

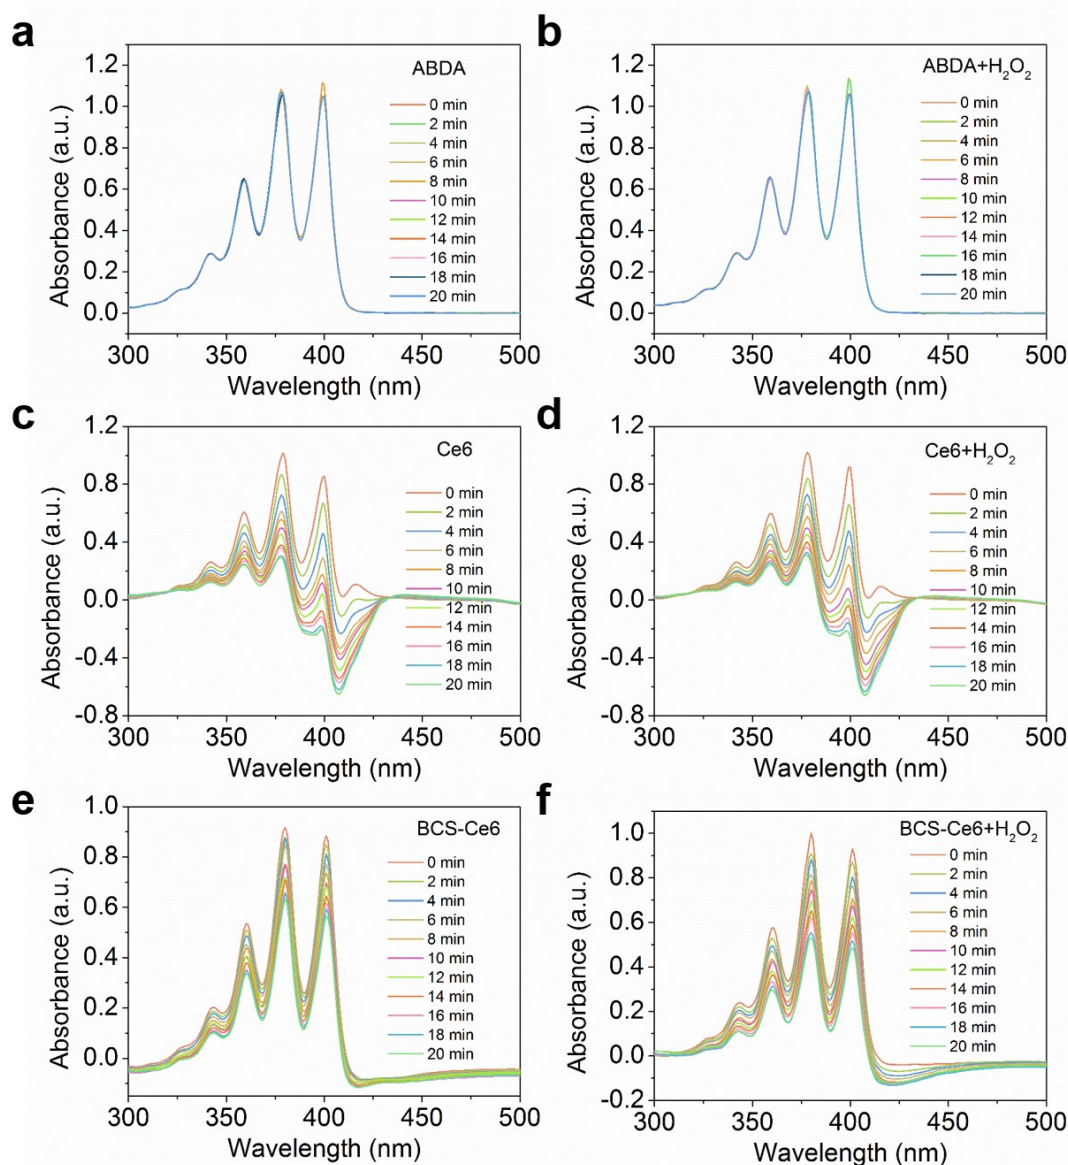

**Fig. S16.** (a-b) UV-vis spectra variation of ABDA under laser irradiation (660 nm, 0.5 W/cm<sup>2</sup>, 20 min) in the absence or presence of hydrogen peroxide (5 mM). (c-d) Absorption spectrum decline of ABDA treated with Ce6 (5 ppm) under laser irradiation (660 nm, 0.5 W/cm<sup>2</sup>, 20 min) in the absence or presence of hydrogen peroxide (5 mM). (e-f) UV-vis spectra change of ABDA treated with BCS-Ce6 (50 ppm) under laser irradiation (660 nm, 0.5 W/cm<sup>2</sup>, 20 min) with or without the adding of hydrogen



peroxide (5 mM).

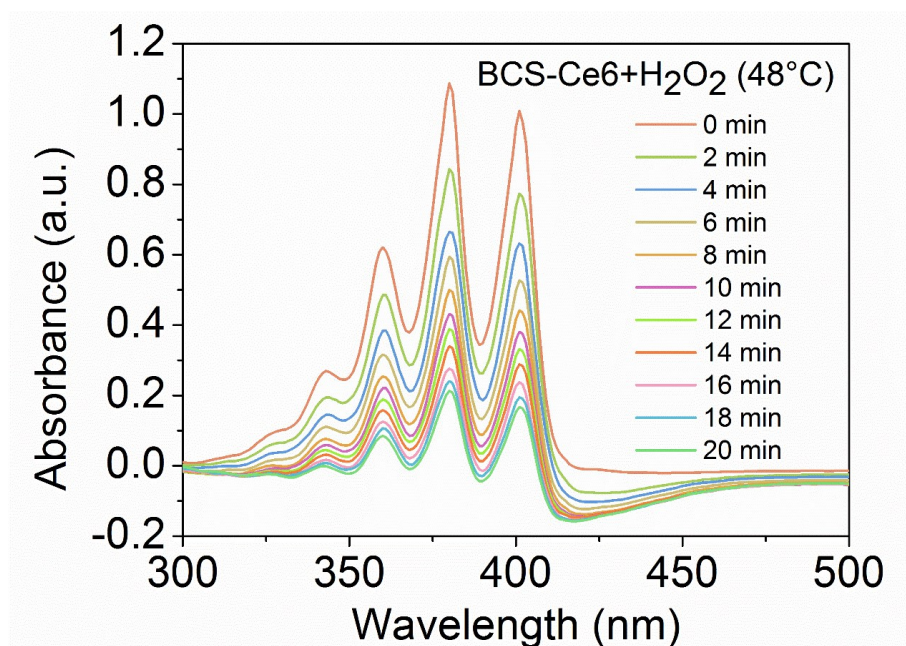

**Fig. S17.** UV-vis spectra decay of ABDA treated with BCS-Ce6 (50 ppm) and hydrogen peroxide (5 mM) at 48°C under laser irradiation (660 nm, 0.5 W/cm<sup>2</sup>, 20 min).

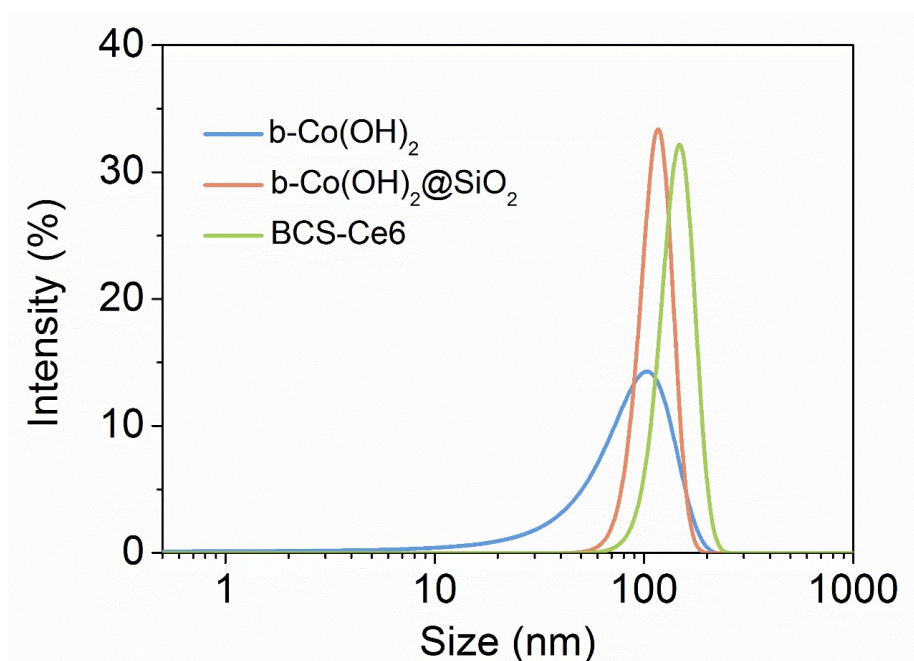



**Fig. S18.** Size distribution of  $\text{b-Co(OH)}_2$ ,  $\text{b-Co(OH)}_2@\text{SiO}_2$  and BCS-Ce6.

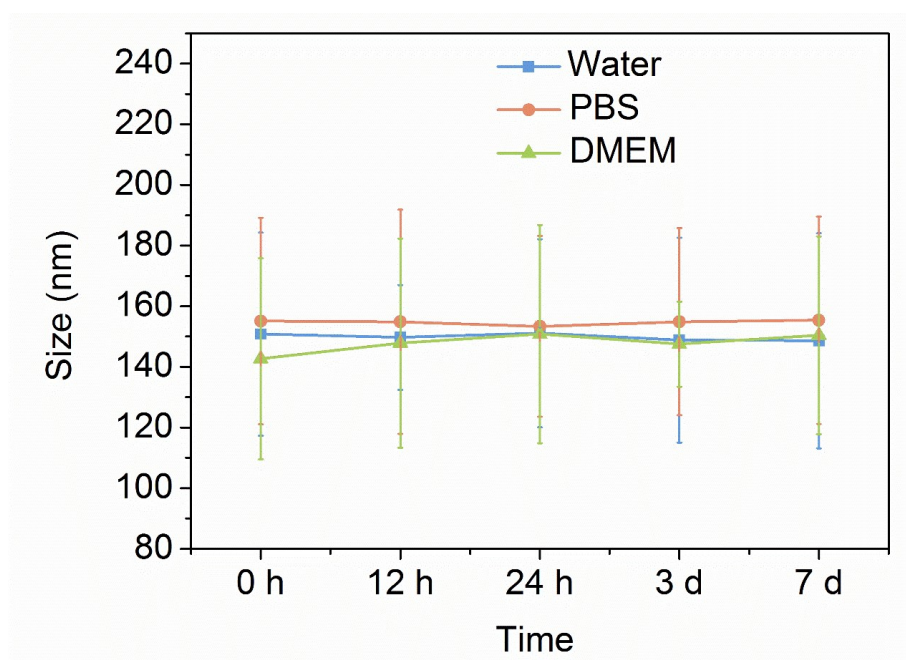

**Fig. S19.** Size distribution of BCS-Ce6 in various mediums (water, PBS and DMEM) at different time points.

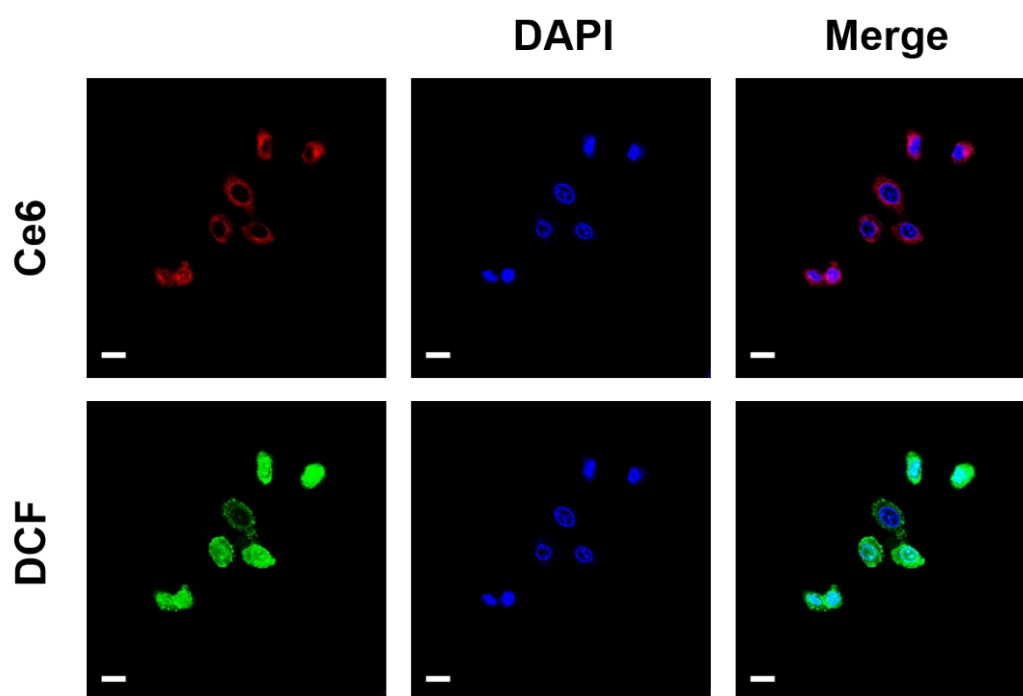

**Fig. S20.** Intracellular ROS generation detected by DCFH-DA in HepG2 cells incubated with Ce6 under 660 nm laser irradiation. DAPI was used to stain nucleus. Scale bar: 20  $\mu\text{m}$ .

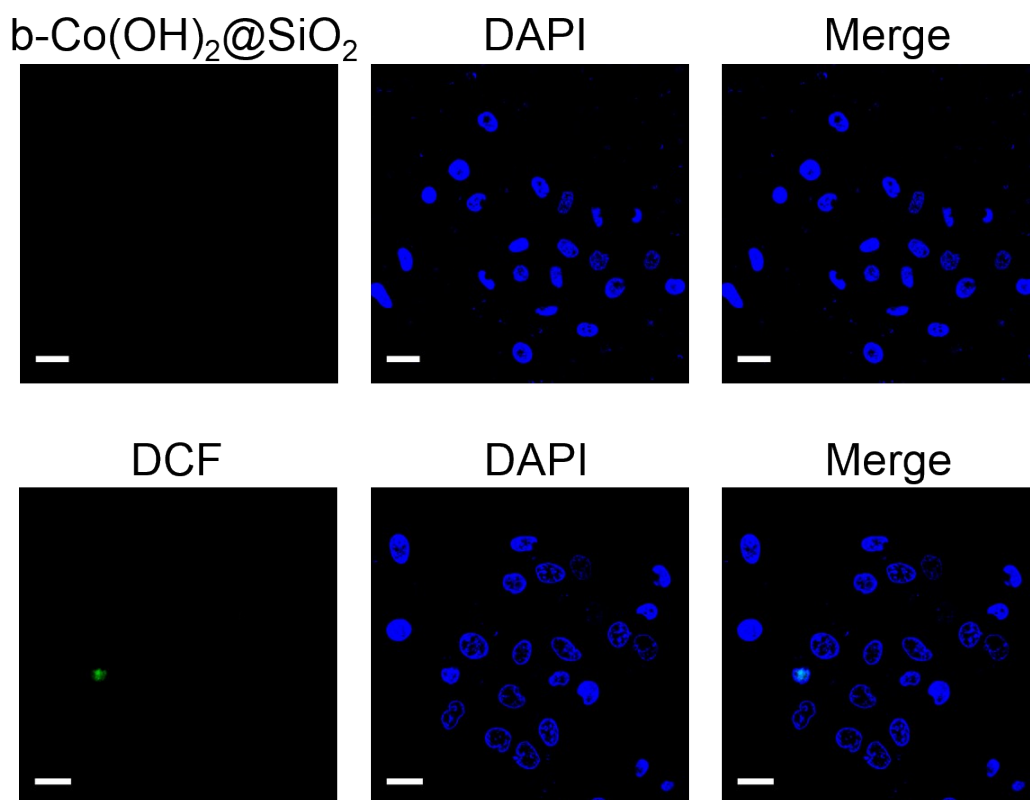

**Fig. S21.** Florescence imaging of HepG2 cells cultured with b-Co(OH)<sub>2</sub>@SiO<sub>2</sub> and the detection of intracellular ROS generation in HepG2 cells treated with b-Co(OH)<sub>2</sub>@SiO<sub>2</sub> upon 660 nm laser irradiation. DAPI was used to locate cells. Scale bar: 20  $\mu\text{m}$ .

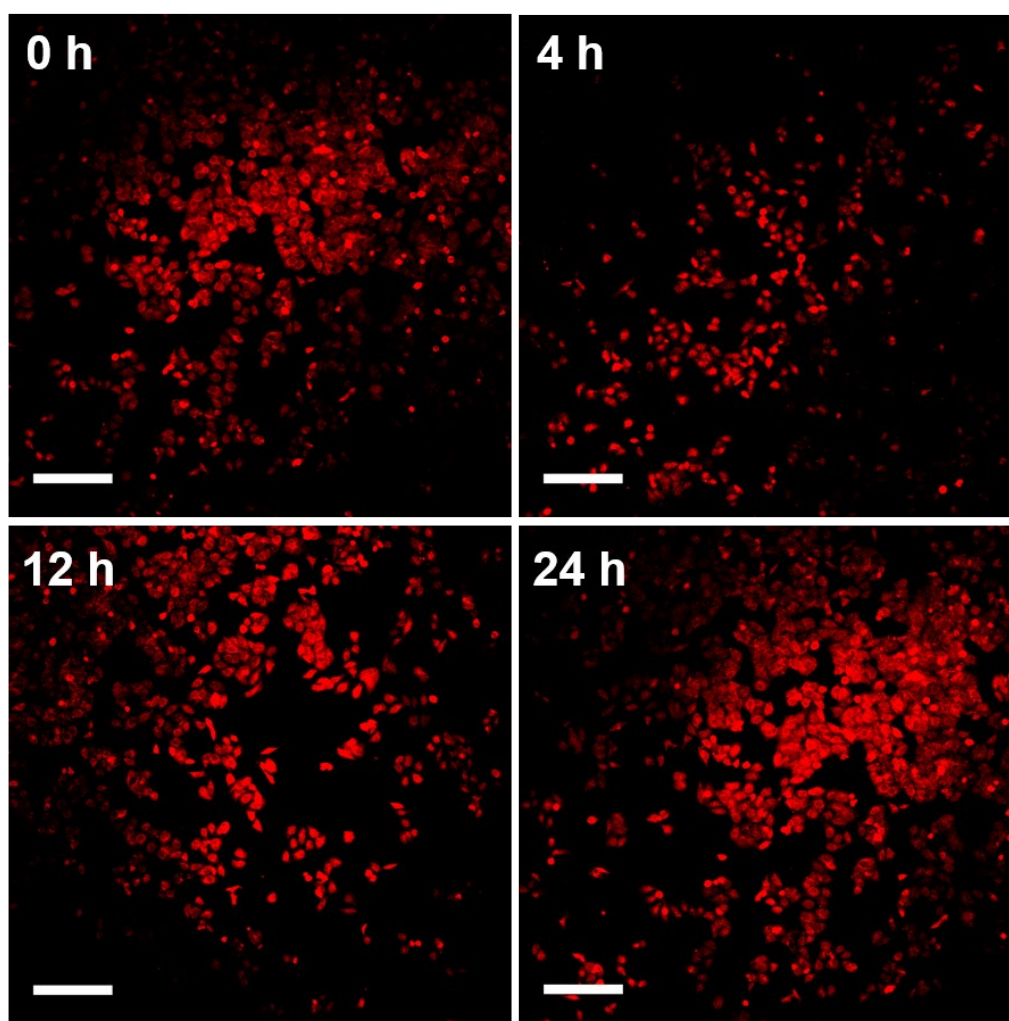

**Fig. S22.** Intracellular oxygen level monitored by O<sub>2</sub> probe RDPP in HepG2 cells at different time points as a control. Scale bar: 200 μm.

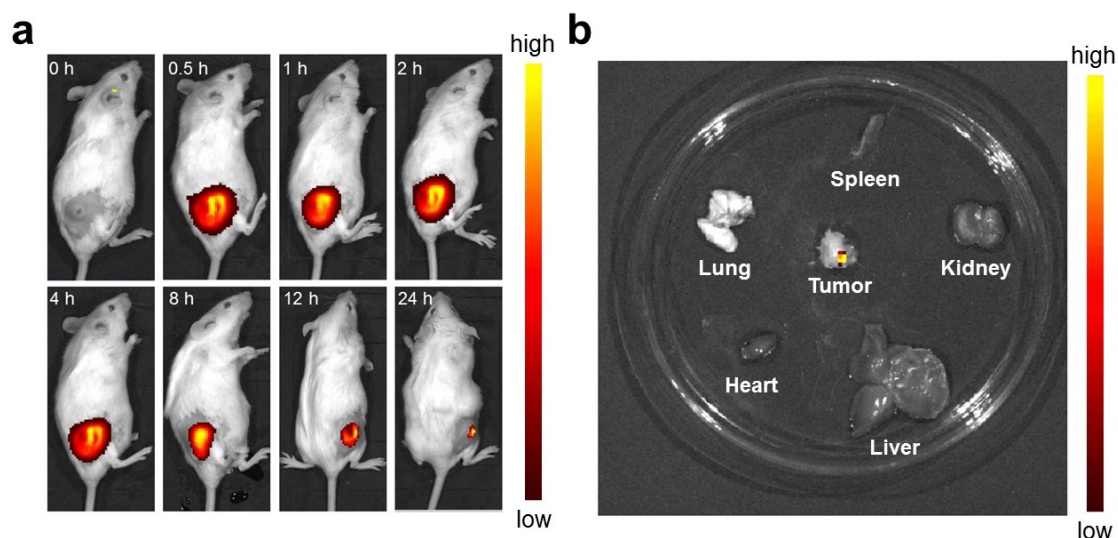

**Fig. S23.** (a) *In vivo* fluorescence imaging of H22-tumor bearing mice at different points after in-situ injection of Ce6 (500 ppm, 20  $\mu$ L). (b) Fluorescence images of dissected organs and tumor 24 h after the injection of Ce6.

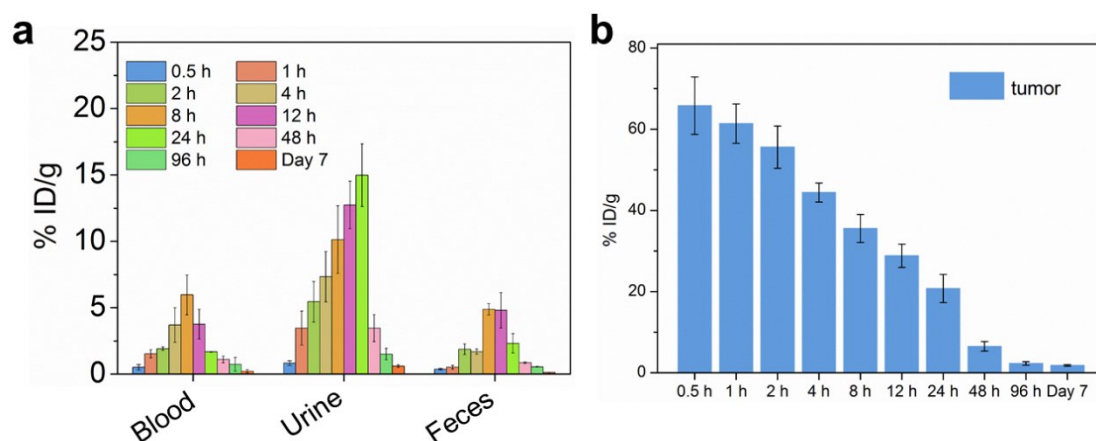

**Fig. S24.** (a) Biodistribution (blood, urine and feces) of BCS-Ce6 in H22-tumor bearing mice at different time points. (b) Co content at tumor sites over time measured by ICP-MS after the injection of BCS-Ce6. The error bars indicated standard deviations (n=3).



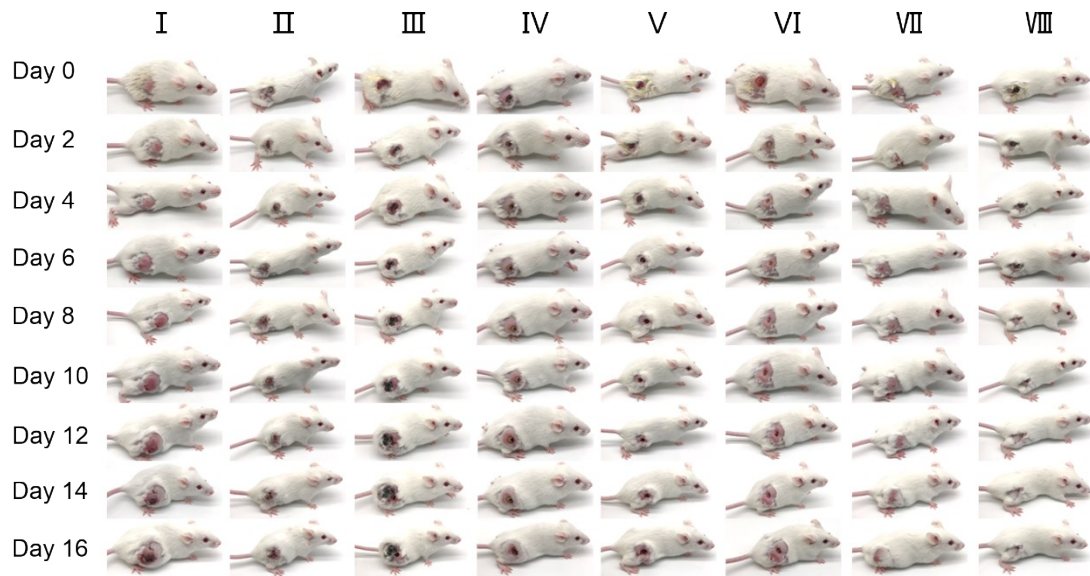

**Fig. S25.** Representative photos of mice during 16 days with different treatments.

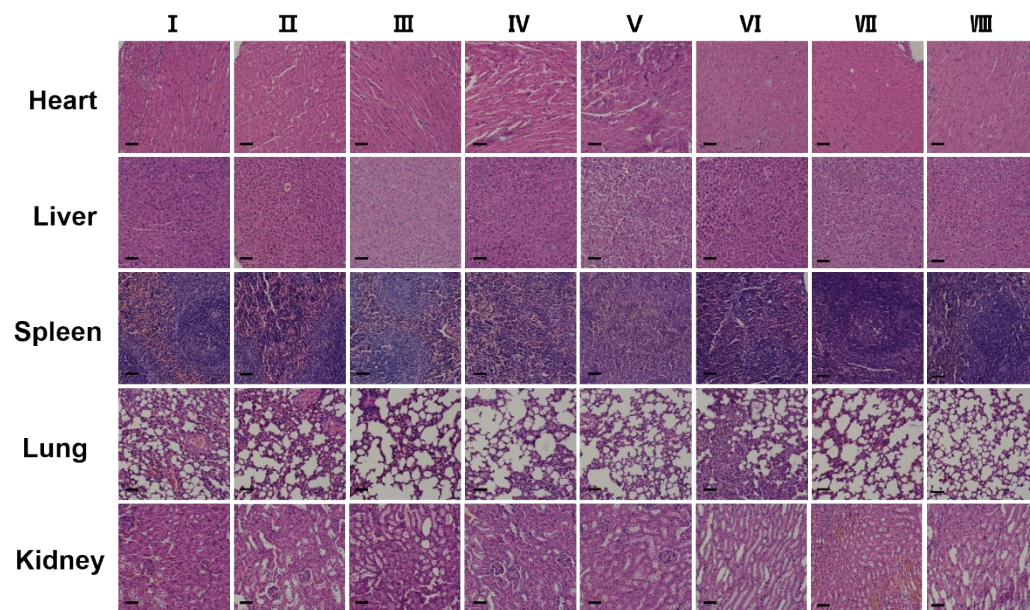

**Fig. S26.** Hematoxylin and eosin (H&E) staining of main organs dissected from H22-tumor bearing mice 16 days after different treatments. Scale bar: 50  $\mu$ m.
